# Supplementary material for: Validity and reliability of the EULAR instrument RAID.7 as a tool to assess individual domains of impact of disease in rheumatoid arthritis: a cross-sectional study of 671 patients
Source: HighWire-hosted journal article supplement (doi:10.1136/rmdopen-2020-001539), 2021-02-01

**Supplementary Table S1: Missing data, ceiling and floor effect of RAID NRS and the scores of the Reference Instruments**

| <b>RAID NRS</b>             | <b>Lowest score (%)</b> | <b>Highest Score (%)</b> | <b>Missing NRS (%)</b> | <b>Missing Reference Instrument (%)</b> |
|-----------------------------|-------------------------|--------------------------|------------------------|-----------------------------------------|
| <b>Pain</b>                 | 4.5                     | 3.8                      | 1.8                    | 11.9                                    |
| <b>Function</b>             | 5.2                     | 4.3                      | 0.9                    | 7.1                                     |
| <b>Fatigue</b>              | 7.5                     | 3.8                      | 0.9                    | 6.6                                     |
| <b>Emotional Well-being</b> | 10.1                    | 1.3                      | 1.2                    | 5.4                                     |
| <b>Physical Well-being</b>  | 5.9                     | 2.5                      | 1.2                    | 13.7                                    |
| <b>Sleep</b>                | 16.5                    | 4.7                      | 0.7                    | 5.5                                     |
| <b>Coping</b>               | 9.7                     | 1.8                      | 0.9                    | 3.9                                     |

### Supplementary Figure S1 A-G: Bland Altman Plot of Difference in NRS scores between screening and baseline

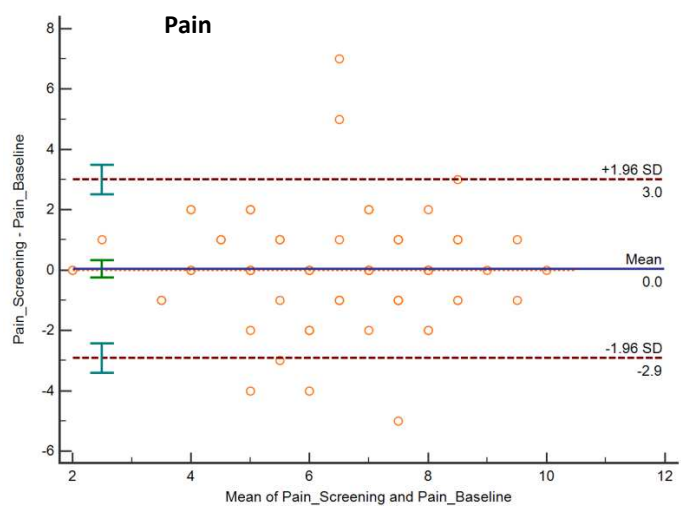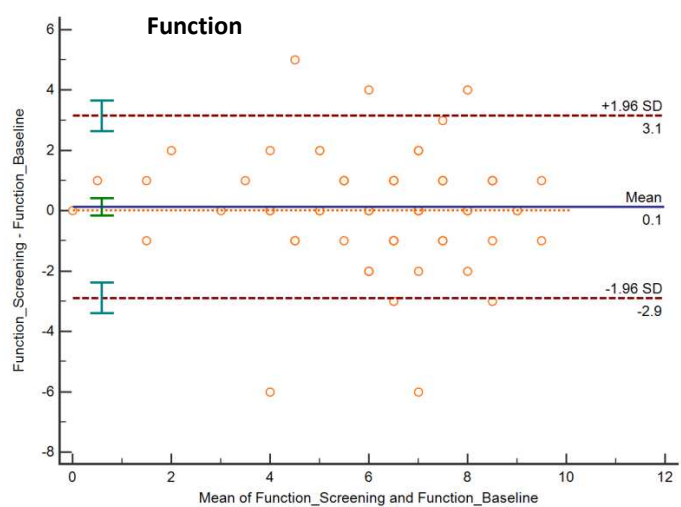

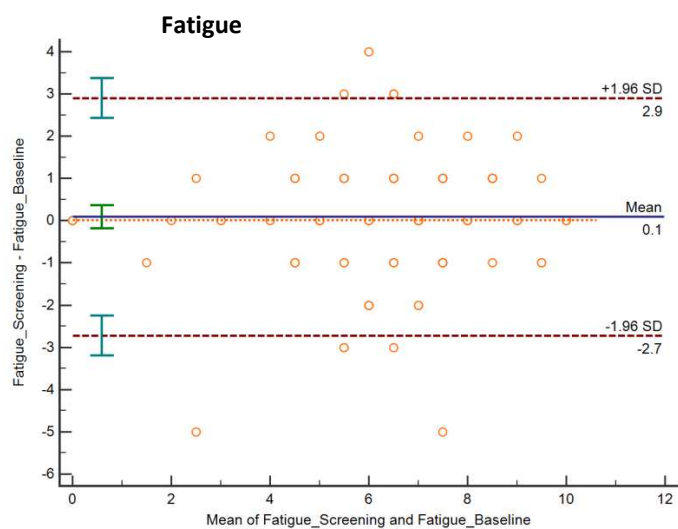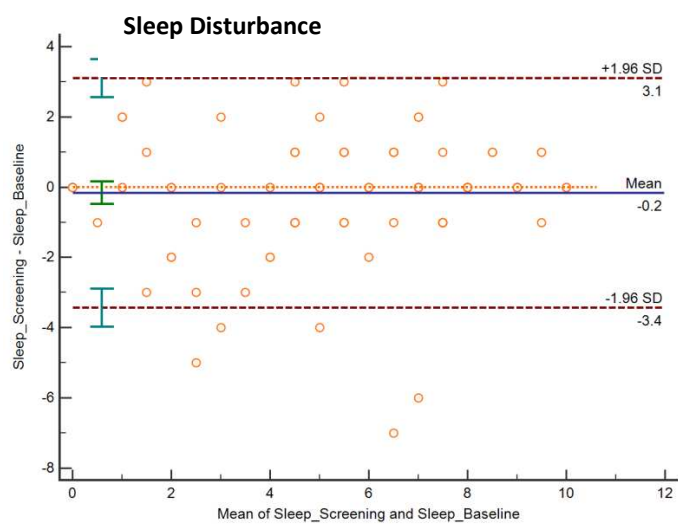

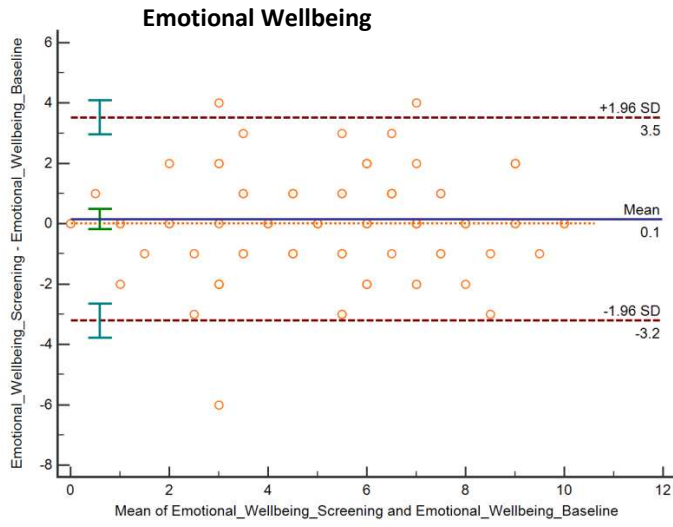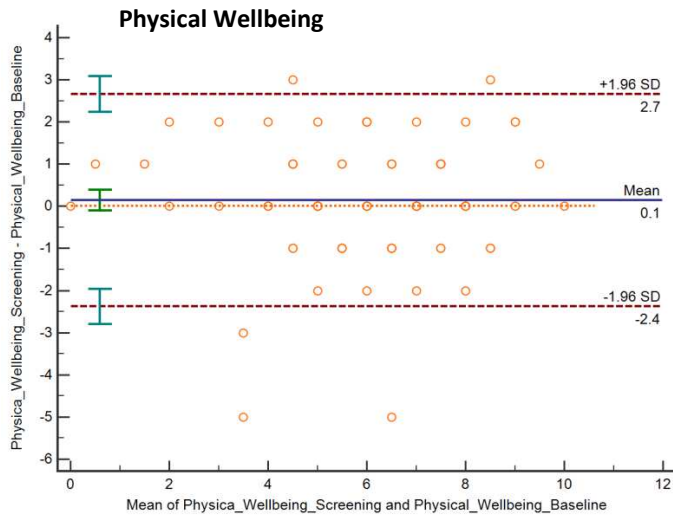

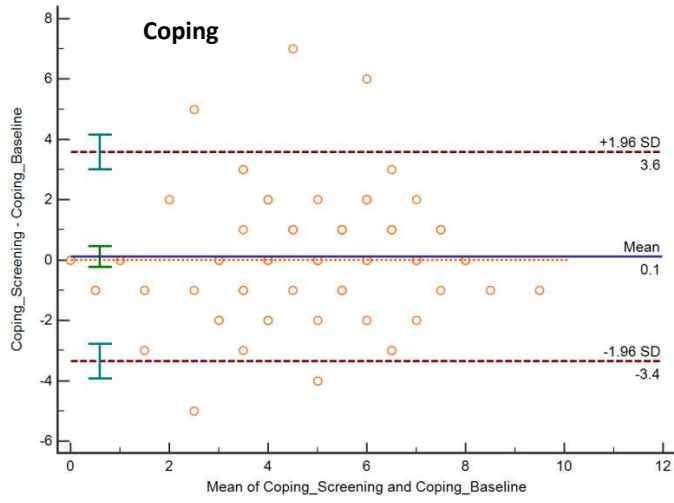

Supplement: rmdopen-2020-001539supp001_data_supplement.pdf [file rmdopen-2020-001539supp001_data_supplement.pdf]
